# Supplementary material for: Effects of molecular structures and solvent properties on the self-assembly of carbazole-based conjugated dendrimers by solvent vapor annealing
Source: Royal Society of Chemistry journal article supplement (doi:10.1039/c3ra23272g), 2013-01-01

## Supplementary Information

**Figure S1** The optical images of the spin-coated H1-BCz film on carbon-coated glass substrates when exposed to different THF vapor pressures for 16 hours. The distances between the sample position and the solvent liquid surface are (A) 0.6 cm, (B) 2.2 cm, (C) 3.8 cm, (D) 5.4 cm, (E) 7cm and (F) 10.2 cm, respectively. (A'), (B'), (C'), (D'), (E'), (F') are the polarized images of (A), (B), (C), (D), (E), (F), respectively.

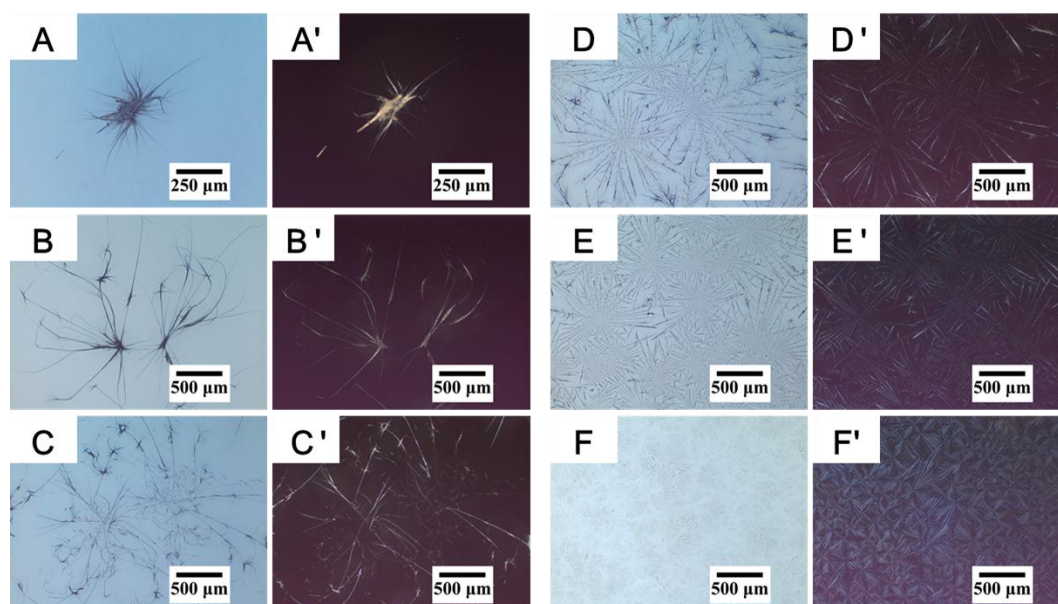

**Figure S2** The images of the self-assembled H1-BCz fibers formed on carbon-coated glass substrates when exposed to different hexane vapor pressures for 16 hours. (A), (B), (C), (D) are the optical images and the distances between the sample position and the solvent liquid surface are (A) 0.6 cm, (B) 2.2 cm, (C) 3.8 cm, (D) 5.4 cm. (E), (F), (G), (H) are the relative AFM height images and (I), (J), (K), (L) are the relative TEM images of (A), (B), (C), (D). The size of the AFM height images is 10  $\mu\text{m}$   $\times$  10  $\mu\text{m}$ .

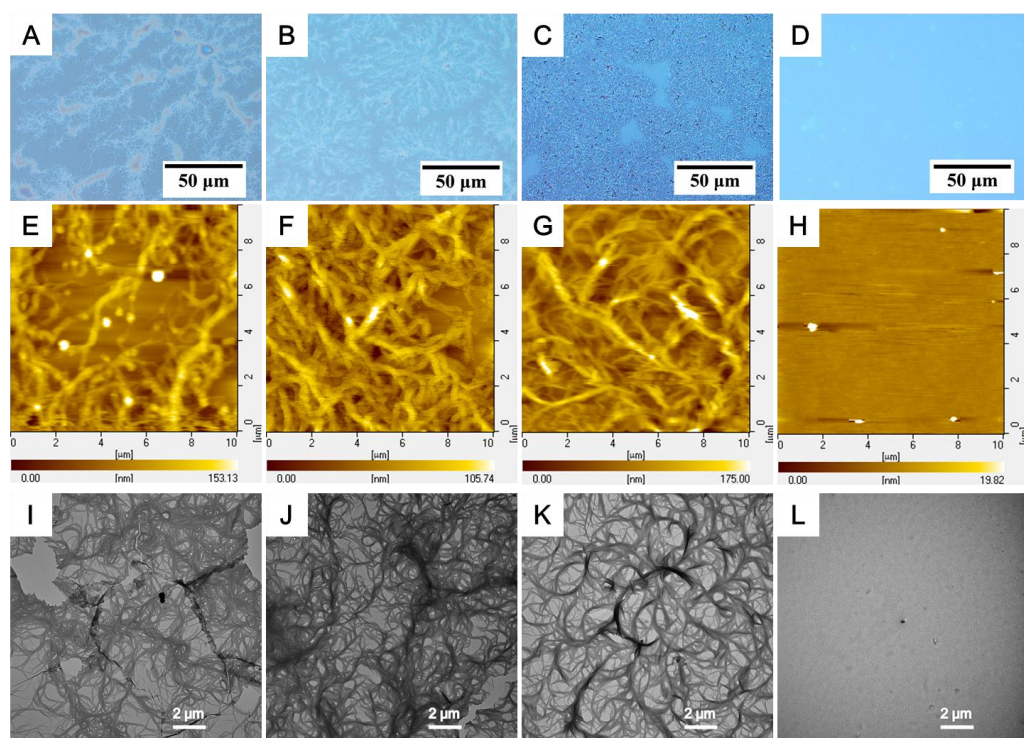

**Figure S3** The in-situ observation of the film morphology changes of H28 films when the spin-coated film on silicon substrates exposing to a certain THF annealing vapor (The position of the sample is 1.6 cm higher than the solvent liquid surface and the volume of the pre-added solvent is 0.05 ml.) for different times. The snapshots from real-time optical microscopy taken at (A) 0 min, (B) 4 min, (C) 6 min, (D) 8 min, (E) 10 min, (F) 12 min, (G) 14 min and (H) 15 min, respectively.

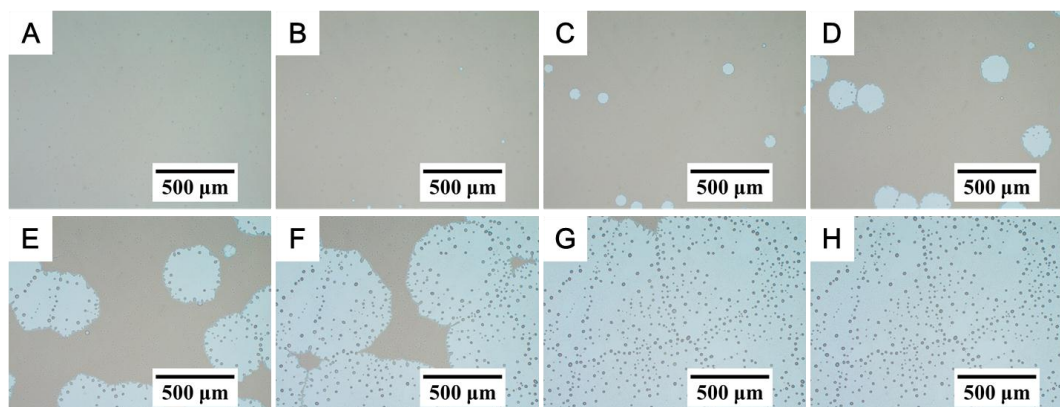

**Figure S4** The optical images of the H28 films (A), (B), (C) on glass and (D), (E), (F) carbon-coated glass substrate when exposed to different hexane vapor pressures for 16 h. The distance between the sample position and the solvent liquid surface is (A) and (D) 0.6 cm, (B) and (E) 2 cm, (C) and (F) 3.8 cm.

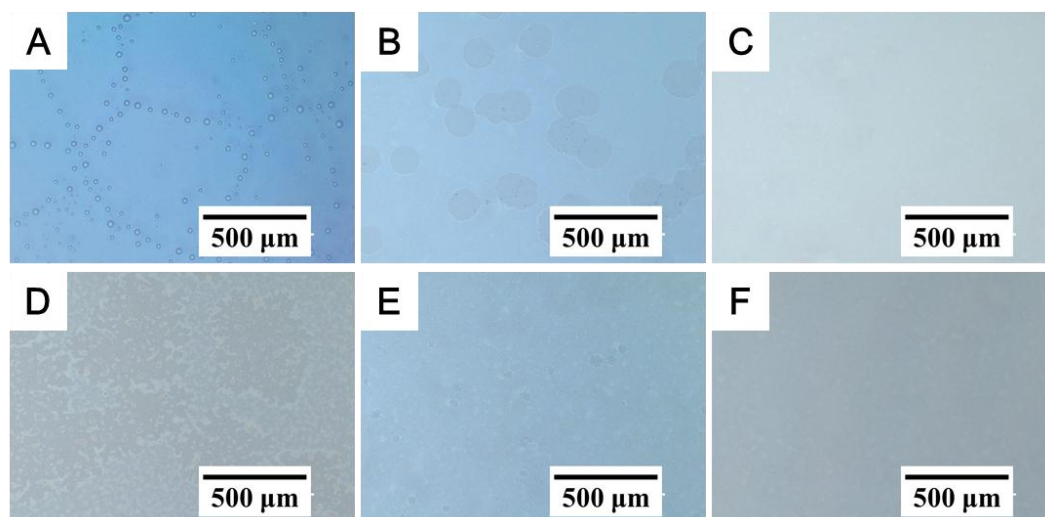

**Figure S5** Concentration-dependent luminescence spectra of (A) H1-BCz and (B) H2-BCz in  $\text{CH}_2\text{Cl}_2$ . The concentrations for H2-BCz solution are  $1 \times 10^{-1} \text{ M}$  (black line),  $2 \times 10^{-2} \text{ M}$  (red line),  $1 \times 10^{-2} \text{ M}$  (blue line),  $1 \times 10^{-3} \text{ M}$  (dark cyan line),  $1 \times 10^{-4} \text{ M}$  (magenta line),  $1 \times 10^{-5} \text{ M}$  (dark yellow line) and  $1 \times 10^{-6} \text{ M}$  (navy line). The excitation wavelength is 290 nm.

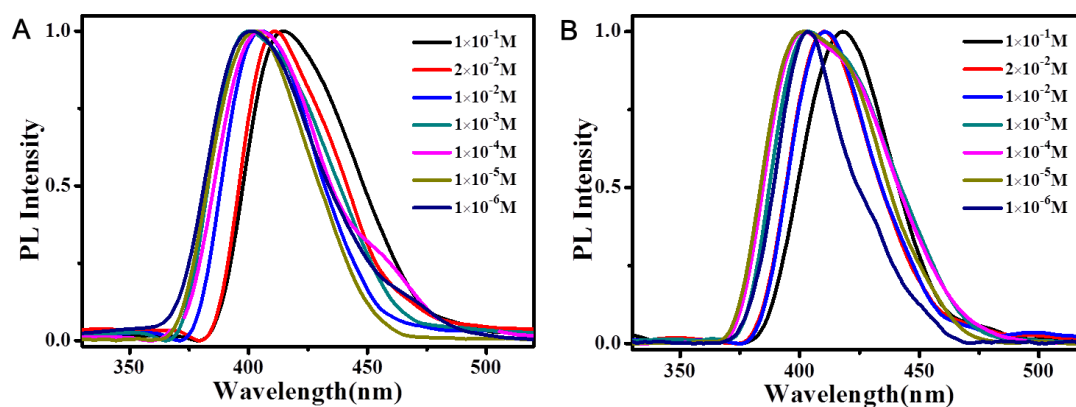

**Figure S6** The contact angle of the solvents on the substrates: (A) THF on glass, (B) hexane on glass, (C) THF on carbon-coated glass and (D) hexane on carbon-coated glass.

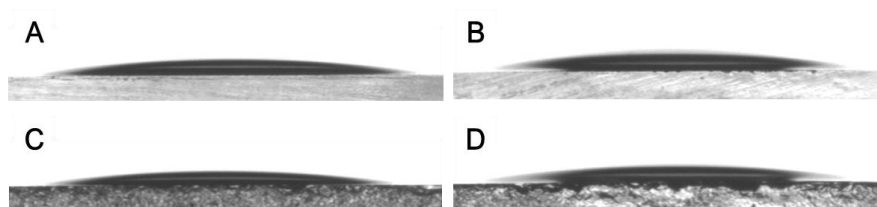

Supplement: c3ra23272g.pdf [file c3ra23272g.pdf]
